# Supplementary material for: The ABCG2 Q141K hyperuricemia and gout associated variant illuminates the physiology of human urate excretion
Source: PubMed Central journal article supplement (PMC7265540; doi:10.1038/s41467-020-16525-w), 2020-06-02
Supplement: 41467_2020_16525_MOESM1_ESM.pdf [file 41467_2020_16525_MOESM1_ESM.pdf]

**The *ABCG2* Q141K hyperuricemia and gout associated variant illuminates the physiology of human urate excretion**

**Hoque *et al.***

**Supplementary Information**

## Supplementary Figure 1: Interventional study extended data

A: Analysis stratified by ancestry

### Polynesian

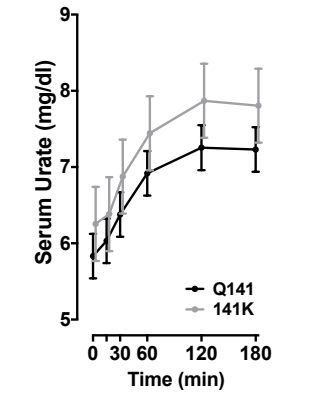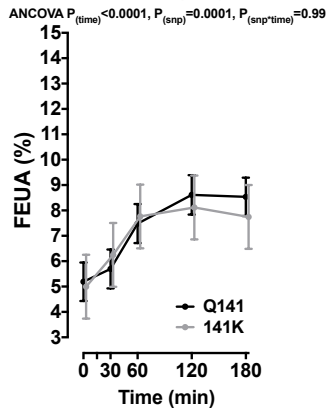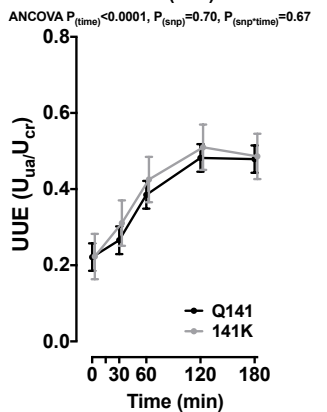

### European

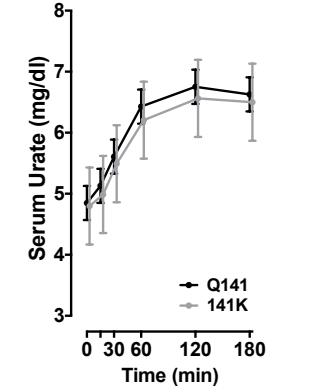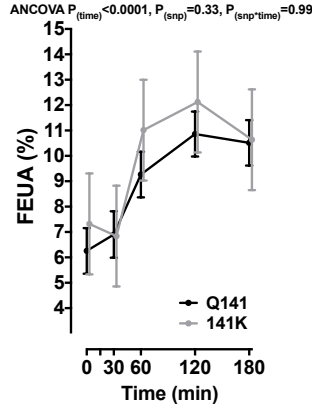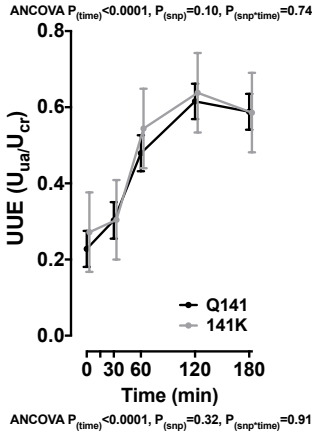

## Supplementary Figure 1:

(A) Effect of *ABCG2* genotypes (Q141, n=79 and 141K, n=21 participants, Supplementary Table 1 for characteristics of participants), stratified by ancestry, on dependence of serum urate (SU), FEUA, and urinary urate excretion (UUE) in participants of either Polynesian or European ancestry following inosine load (+/- standard deviation of the mean [SD]). Statistical significance evaluated by a two-tailed ANCOVA, adjusted for age, sex, and BMI. Source data are provided as a Source Data file.

# Supplementary Figure 1: Interventional study extended data (continued)

## B: Relationship between SU and FEUA in Q141 and 141K individuals

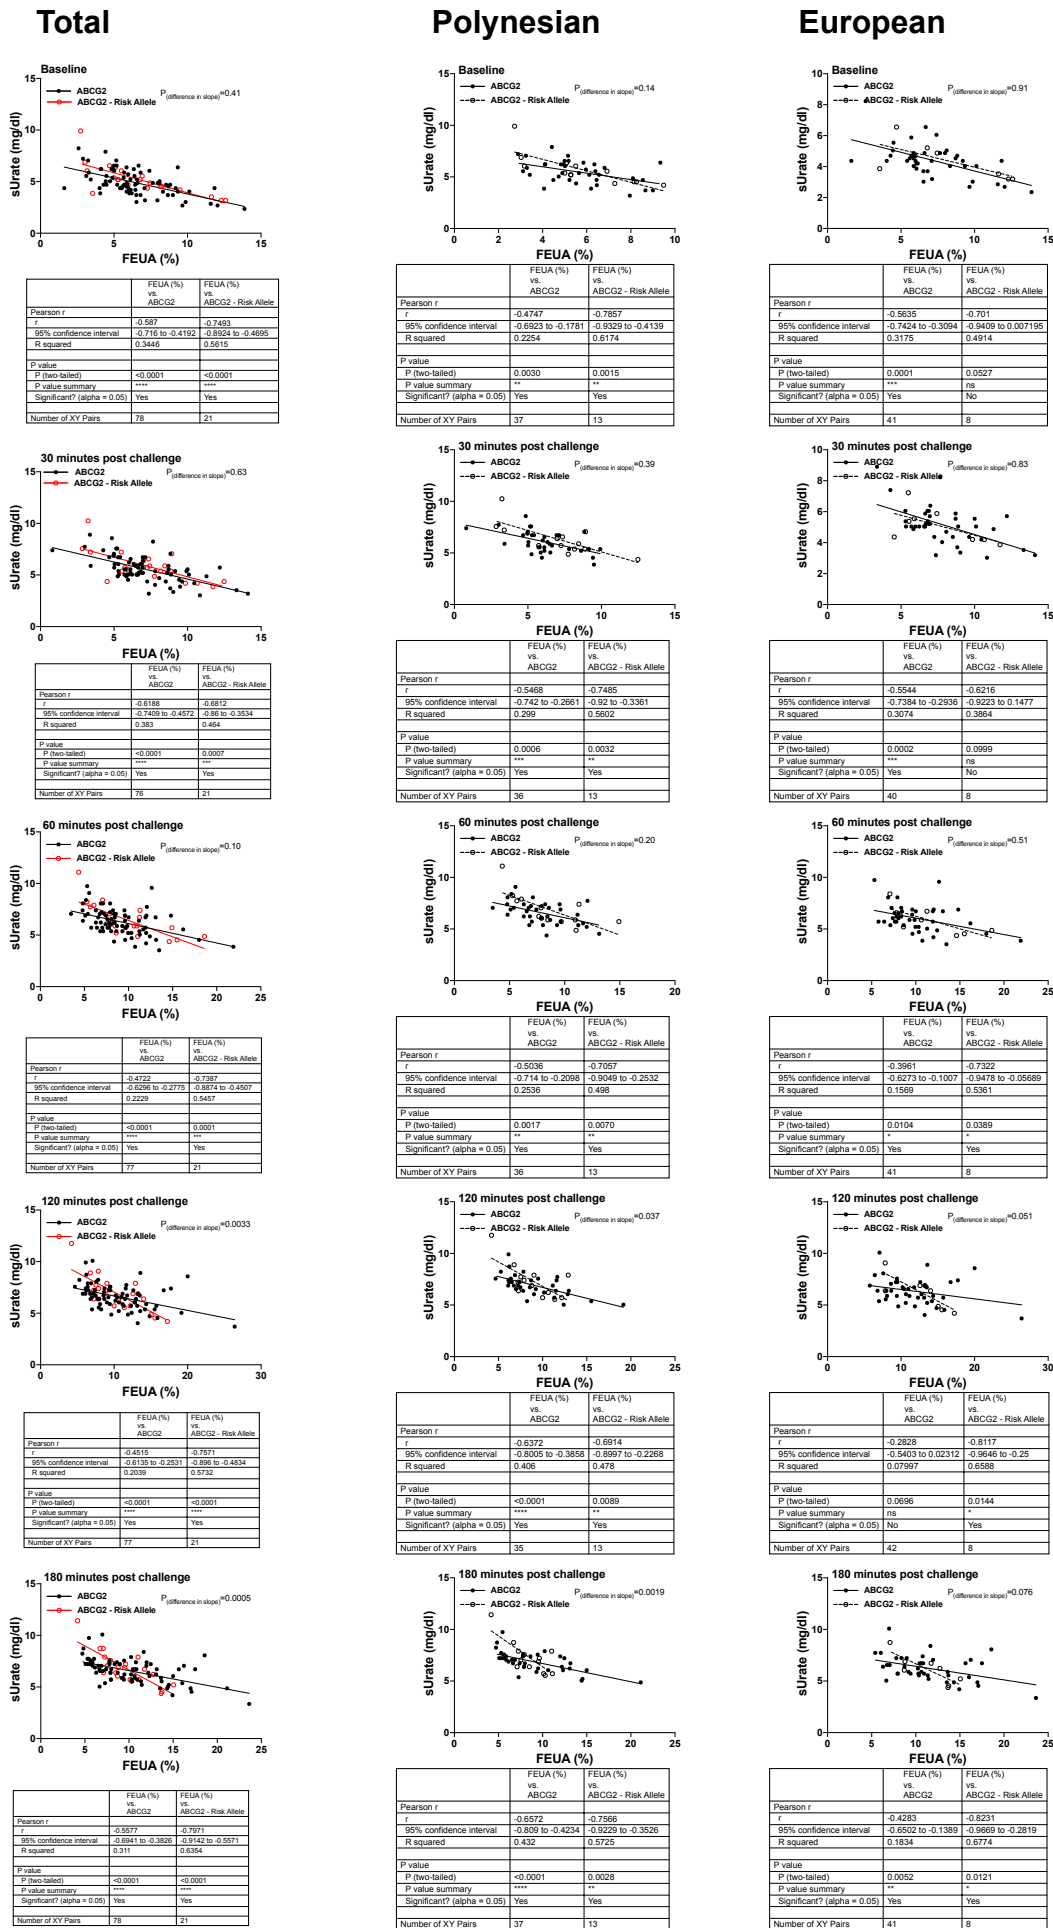

## Supplementary Figure 1 (continued):

(B) Effect of *ABCG2* genotypes on dependence of SU on FEUA stratified by ancestry, Polynesian or European, adjusted for age, sex, and BMI. Each SU and commensurate FEUA measured at each of 5 time points plotted for each individual with the Q141 allele (black or solid line) or 141K (risk) allele (red or dashed line) with linear regression fits extended, comparable to the nonstratified data in Figure 1 D and E. Time points for each ancestry or total has a unique panel where the number of participants (n, or xy pair), statistical test and p value are listed. Comparison of slopes of linear regression done with two-tailed ANCOVA. Source data are provided as a Source Data file.

**Supplementary Figure 1: Interventional study extended data (continued)**

C: Effect of *ABCG2* genotypes on dependence of SU on FEUA, stratified by ancestry

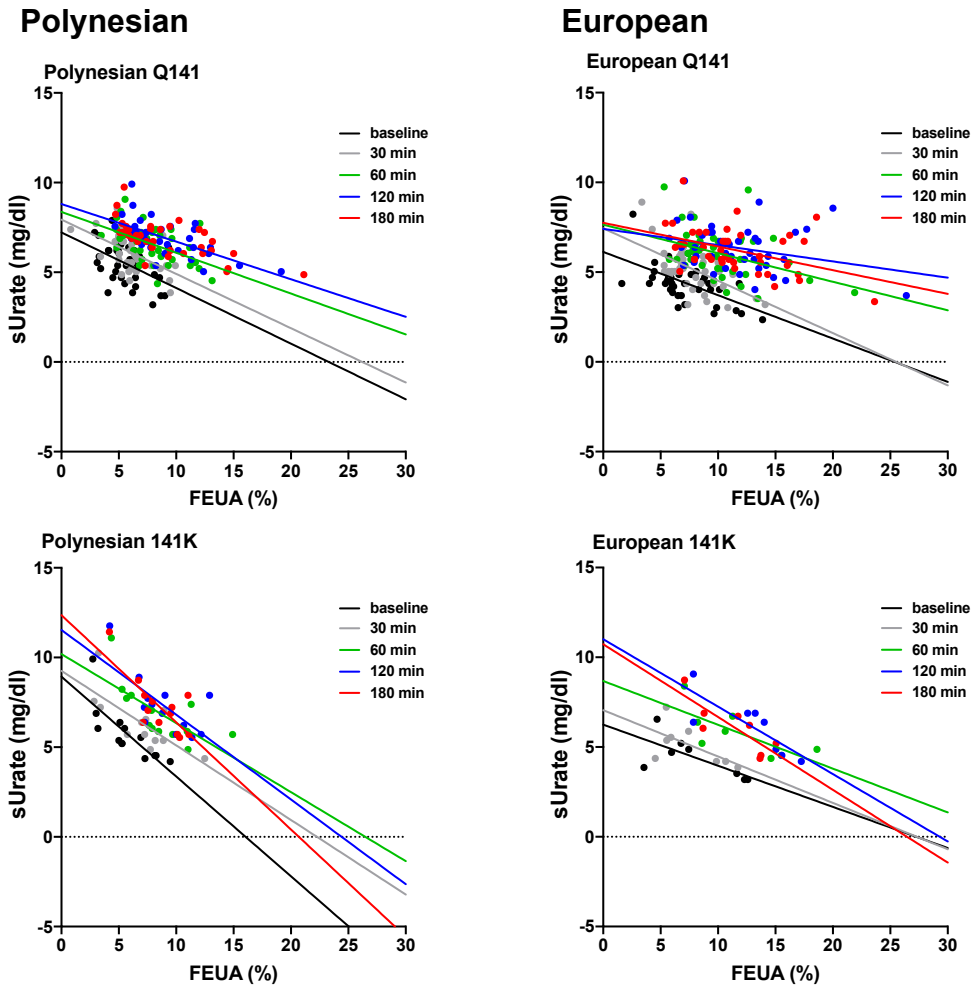

D: Effect of *ABCG2* genotypes on dependence of SU on UUE, stratified by ancestry

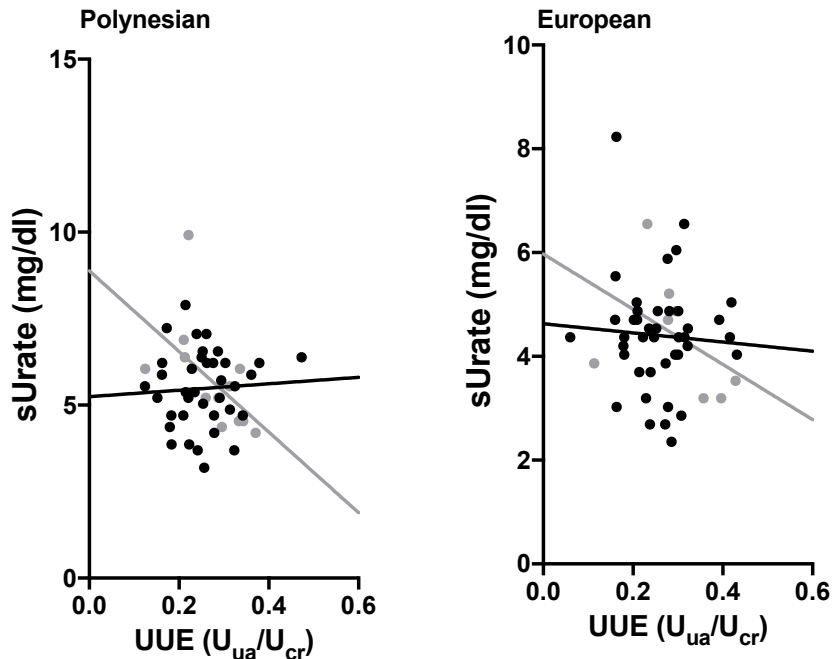

**Supplementary Figure 1 (continued):**

(C) Effect of *ABCG2* genotypes (Q141, n=79 and 141K, n=21 participants, Supplementary Table 1 for characteristics of participants), stratified by ancestry, on serum urate's (SU) dependence on FEUA; each SU and commensurate FEUA measured at each of 5 time points plotted for each individual with the Q141 allele or 141K (risk) allele with linear regression fits extended stratified by ancestry, Polynesian or European. (D) Effect of *ABCG2* genotypes (Q141, n=79 and 141K, n=21 participants, Supplementary Table 1 for characteristics of participants), stratified by ancestry, on serum urate (SU) dependence on UUE at baseline (time 0) plotted with linear regression fits (Q141 allele, 141K allele) extended until UUE = 0. Source data are provided as a Source Data file.

## Supplementary Figure 2: Interventional study extended data

A: SU and FEUA in participants with or without protective (urate-lowering) C allele of *SLC2A9* rs11942223

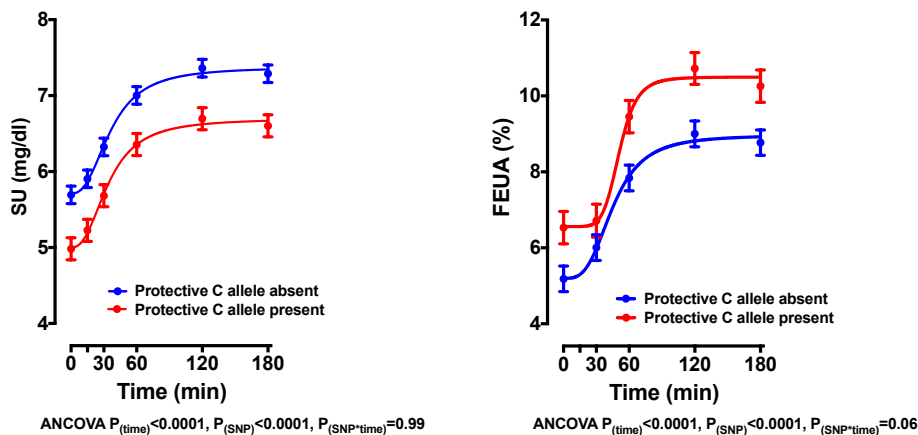

B: SU and FEUA in participants with *SLC2A9* variant stratified by ancestry

### Polynesian

### European

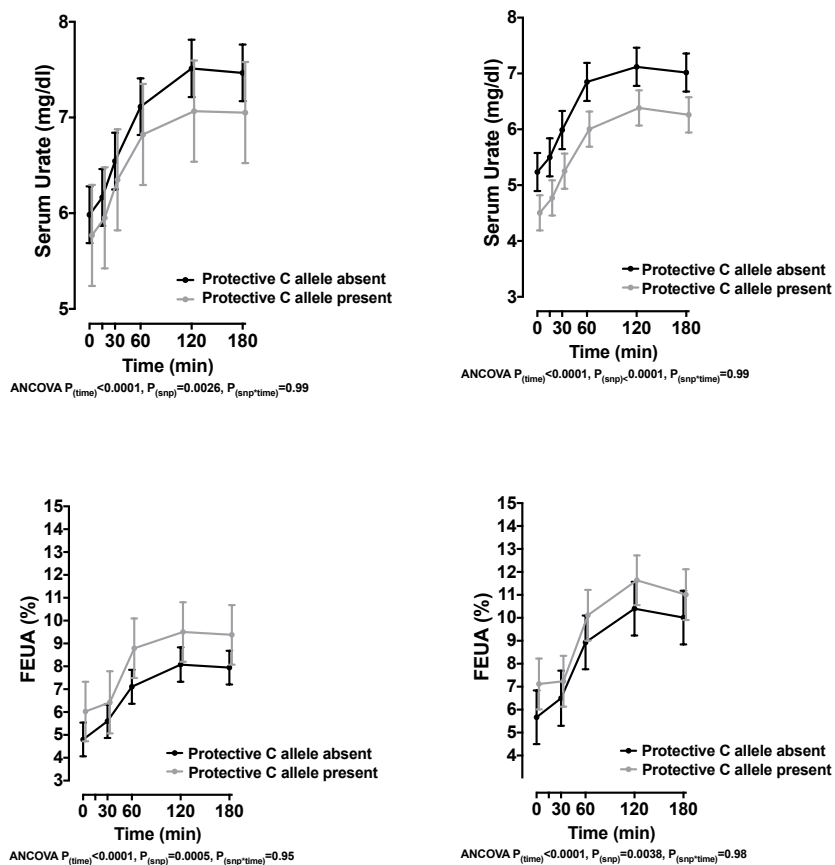

## Supplementary Figure 2: Interventional study extended data

(A) Effect of *SLC2A9* genotypes (participants with [n=38] or with out [n=62] the protective, urate-lowering, C allele) on serum urate (ANCOVA:  $p_{(time)} < 0.0001$ ;  $p_{(SNP)} = 0.0001$ ;  $p_{(SNP*time)} = 0.99$ ) and fractional excretion of urate (FEUA) (ANCOVA:  $p_{(time)} < 0.0001$ ;  $p_{(SNP)} = 0.0001$ ;  $p_{(SNP*time)} = 0.06$ ) following inosine load to entire group (100 participants; +/- SEM). (B) Secondary analysis of *SLC2A9* genotypes, stratified by ancestry, on serum urate and FEUA in participants of either Polynesian or European ancestry following inosine load (100 participants; +/- SD of the mean). Statistical significance evaluated by a two-tailed ANCOVA, adjusted for age, sex, BMI and ancestry (A only). Source data are provided as a Source Data file.

**Supplementary Figure 3: Human and mouse renal tissue data**

**(A)**

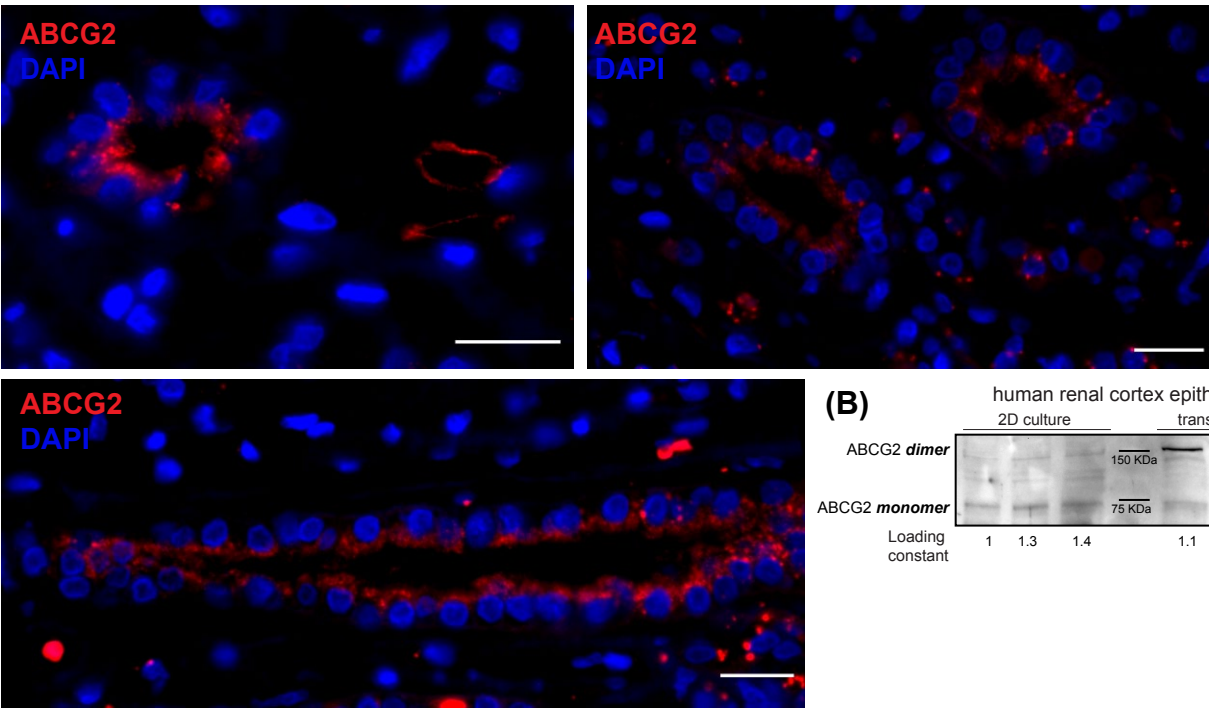

**(B)**

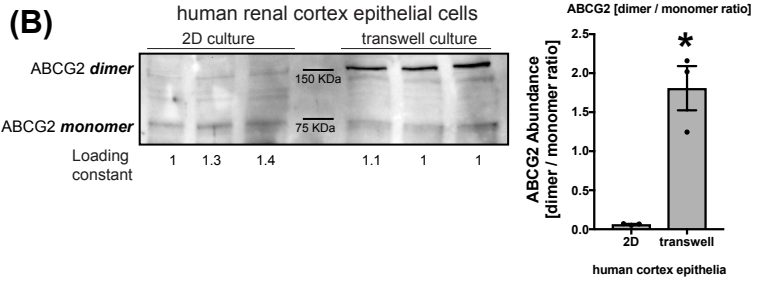

**(C)**

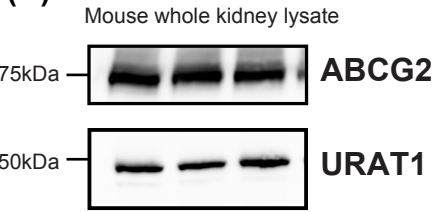

**(E)**

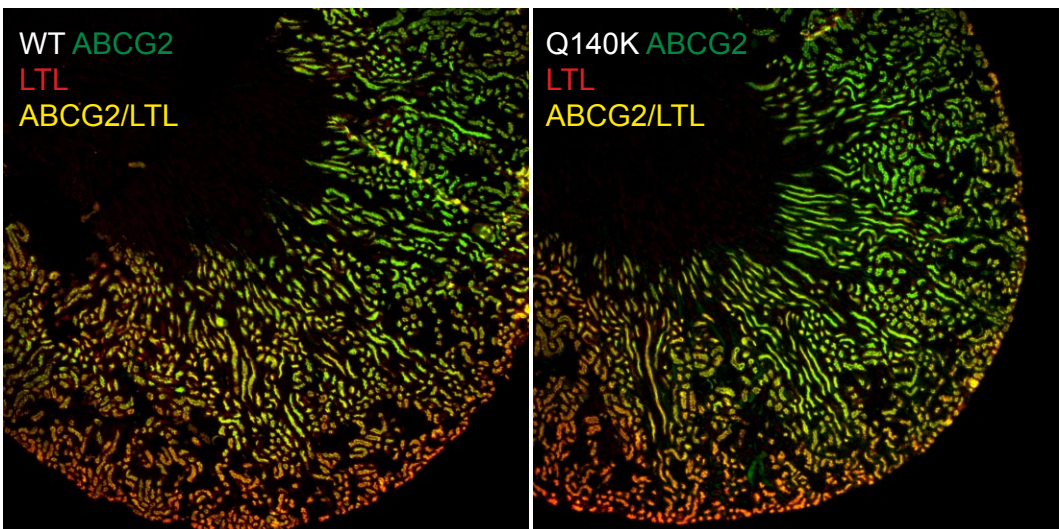

**(D)**

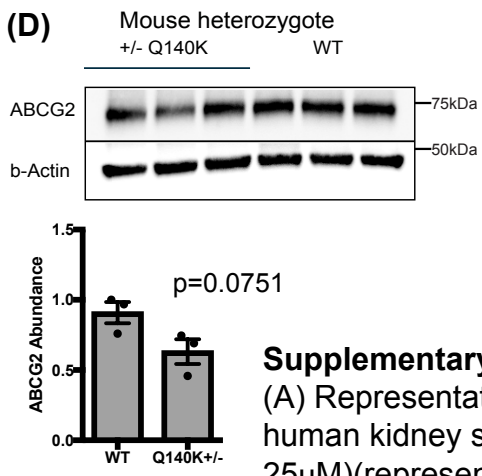

**Supplementary Figure 3: Human and mouse renal tissue data**

(A) Representative immunofluorescence micrographs of fixed medullary sections of human kidney samples stained for ABCG2 (red), and DAPI (blue) at 400x (scale bar 25μM)(representative of three independently repeated experiments from n=3 kidneys). (B) Western blot of cell lysate from human renal cortical epithelial cells cultured either on a flat culture dish (2D) or on a transwell, loading constant determined by total lane protein, with quantification of the dimer to monomer ratio (n=3 cultures / dishes of each, significant p=0.01, two-tailed t-test, +/-SEM). (C) Western blots of total kidney homogenate from WT (n=3) mice blotted with either ABCG2 or URAT1. (D) Relative abundance of ABCG2 protein in WT, or Q140K+/- (heterozygotic animals), n=3, p=0.0751, two-tailed T-test +/-SEM. (E) Representative (similar staining was repeated on tissue from n=3 mice) micrographs (40x; scale bar 500μM) from fixed whole mouse kidney slices stained with ABCG2 (I) in green, LTL (red), and colocalization (yellow). Source data are provided as a Source Data file.

## Supplementary Figure 4: Female metabolic comparisons and ABCG2 abundance

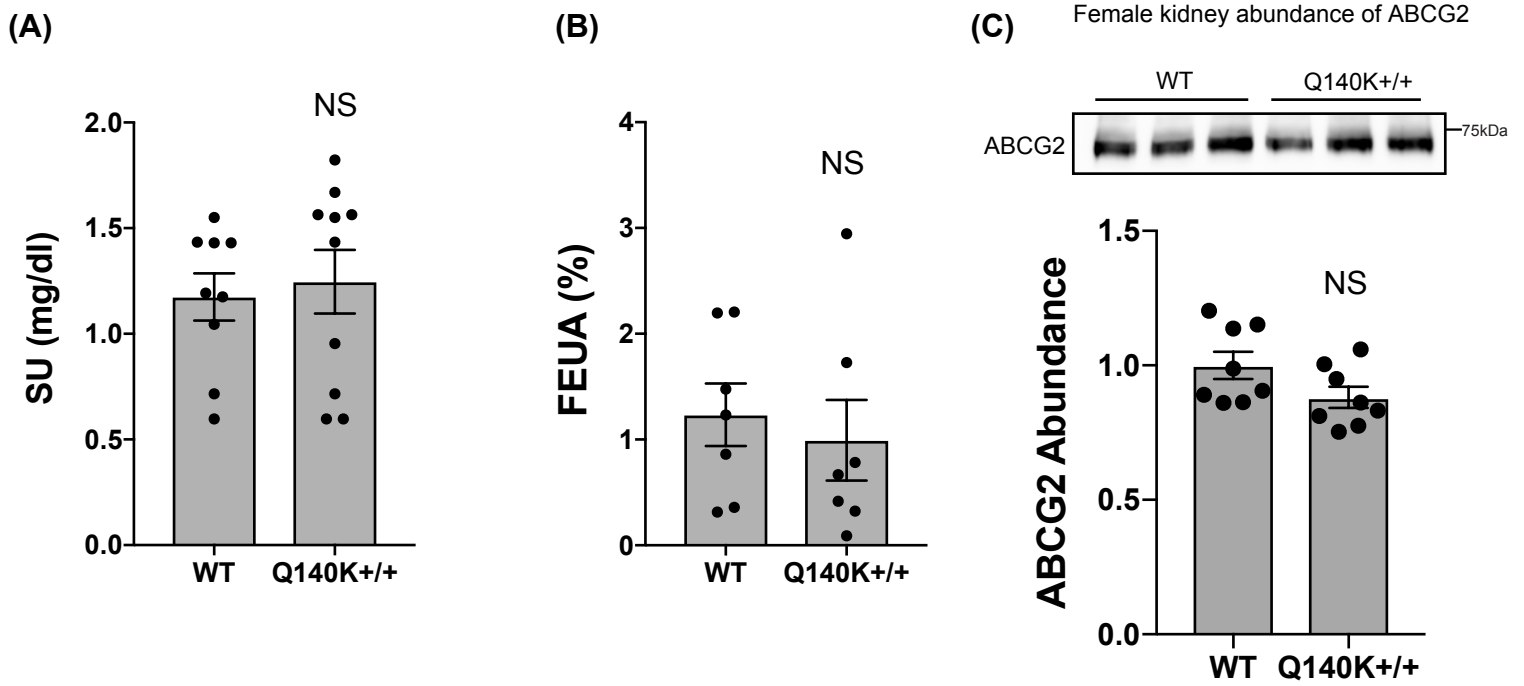

### Supplementary Figure 4: Female metabolic comparisons and ABCG2 abundance

(A) Serum urate levels for female, WT, and Q140K+/+ animals (WT females n=9; Q140K+/+ n=10; p=0.7113, two-tailed Student's t-test +/-SEM). (B) Fractional excretion of urate (FEUA) measurements from female WT (n=7) and female Q140K+/+ (n=7)(p=0.6263, two-tailed Student's t-test +/-SEM). (C) Western blots of total kidney homogenate from WT (n=8) and Q140K+/+ (n=8) mice showed no change in abundance of the Q140K+/+ protein (p=0.0835, two-tailed Student's t-test; loading constant determined by total lane protein analysis [methods]+/-SEM ). Source data are provided as a Source Data file.

## Supplementary Figure 5: Male Q140K<sup>+/+</sup> mice display variable fatty liver phenotype

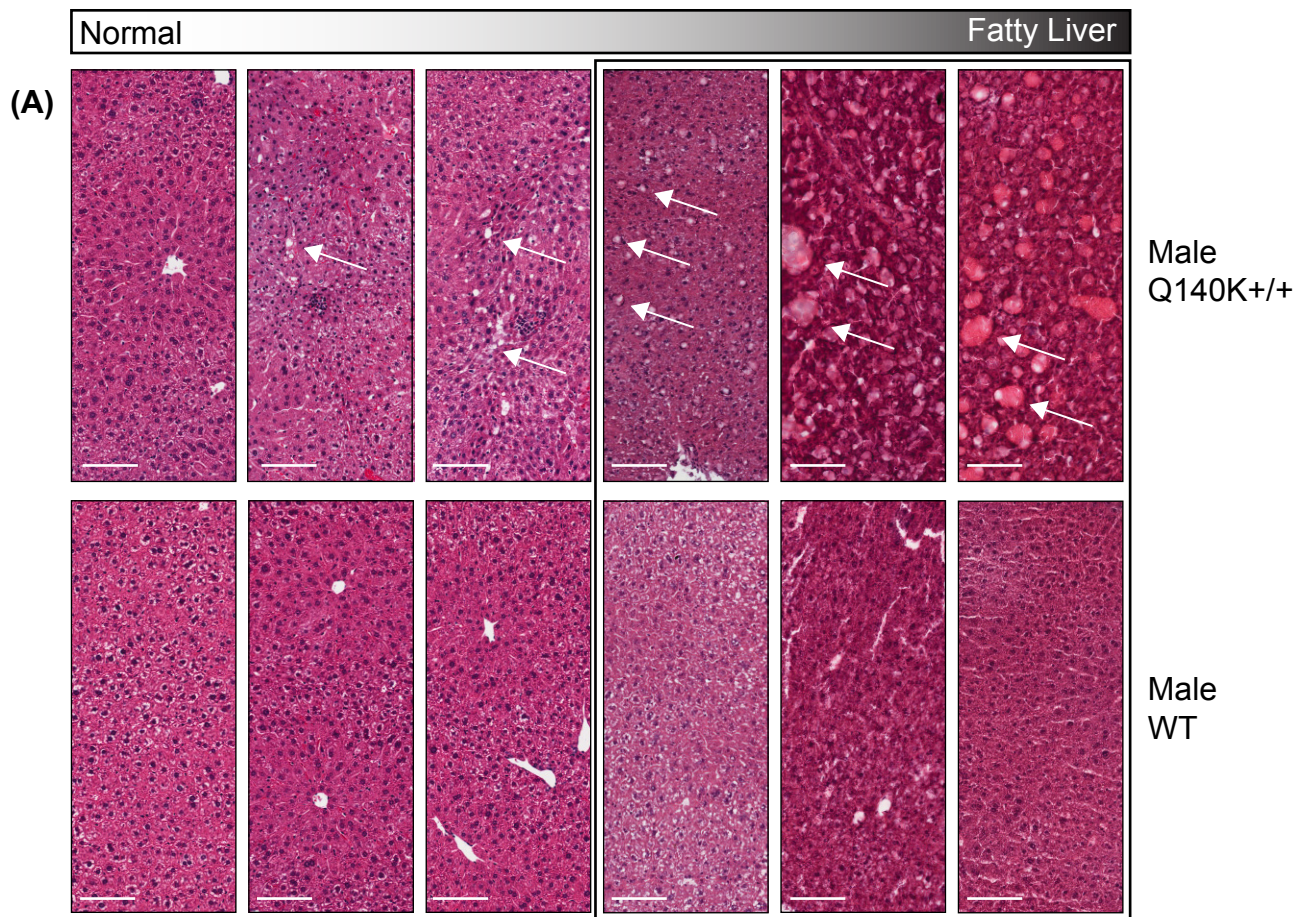

### Supplementary Figure 5: Male Q140K<sup>+/+</sup> mice display variable fatty liver phenotype

(A) H and E stained liver samples from WT (n=6) and Q140K<sup>+/+</sup> (n=6) male mice. The livers of the Q140K<sup>+/+</sup> mice displayed a continuum of accumulated liver fat, some with no apparent fat, but others with significant fat accumulation (white arrows; scale bar is 200  $\mu$ M).

(B) Quantitative RT-PCR of 7 common genes associated with non-alcoholic fatty liver disease (NAFLD) from the three Q140K<sup>+/+</sup> livers with significant fat accumulation (pictured in A) as compared to the matched controls revealed three genes, *G6pd* ( $p=0.032$ ), *Pnpla3* ( $p=0.050$ ), and *Pnpla2* ( $p=0.012$ ) to be significantly altered (n=3 WT and Q140K<sup>+/+</sup>; two-tailed Student's t-test, +/- SEM). Source data are provided as a Source Data file.

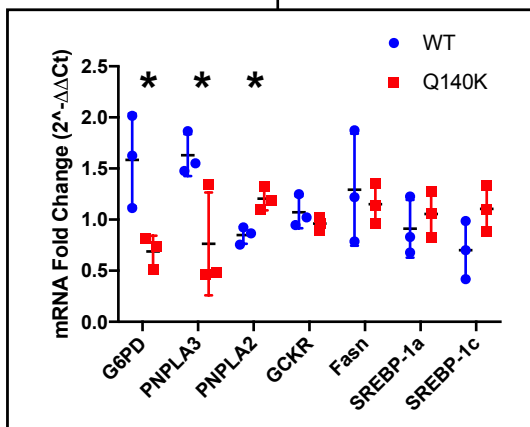



## Supplementary Figure 6: Further intestinal data from mouse model

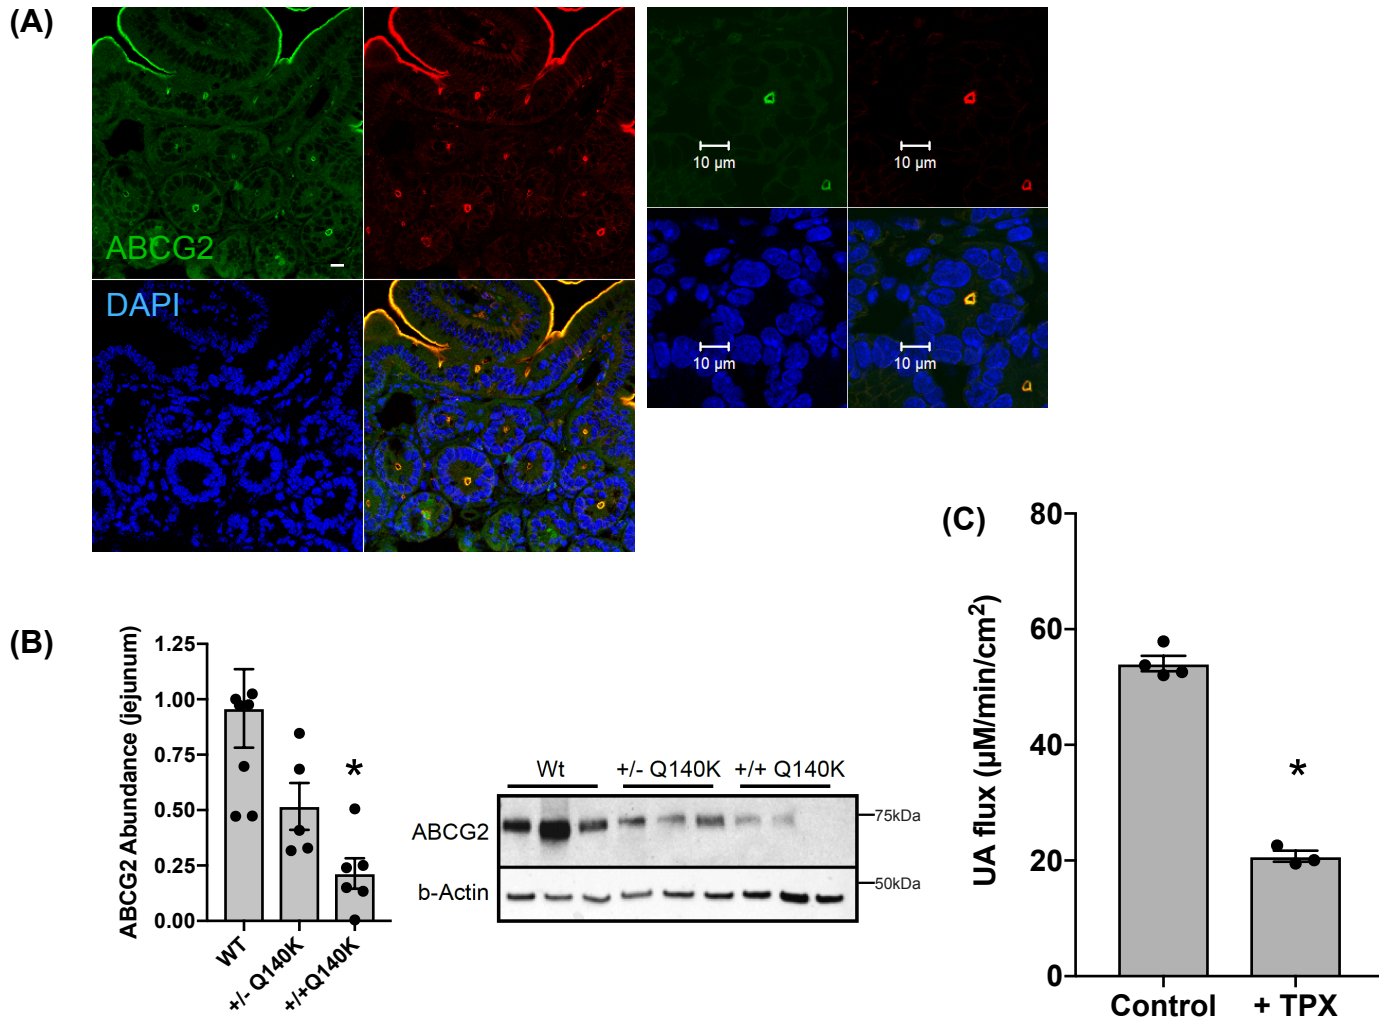

## Supplementary Figure 6: Further intestinal data from mouse model

(A) Representative immunofluorescence micrographs of fixed sections of the crypt region of mouse small intestines (from  $n=4$  mice) stained for ABCG2 (green), villi brush border marker beta-actin (red), DAPI (blue), and colocalization of ABCG2 and beta-actin (yellow) at 400x and 630x, scale bar 10 $\mu$ M in all images. (B) Abundance of ABCG2 in the jejunum of WT ( $n=8$ ), Q140K $\pm$  ( $n=5$ ), and Q140K $\pm\pm$  ( $n=6$ ) male animals, and representative western blot of quantified ABCG2 abundance, loading control is beta-actin; one way ANOVA with post hoc Dunnett's test;  $p=0.003$ ,  $\pm$ -SEM. (C) Mean luminal flux in WT ( $n=3$ ) and Q140K $\pm\pm$  ( $n=3$ ) jejunum loops showed different sensitivity to ABCG2 inhibitor Topiroxostat (TPX) ( $p<0.0001$ , two-tailed Student's t-test;  $\pm$ -SEM). Source data are provided as a Source Data file.

## Supplementary Figure 7: Partial sex stratified analysis

A: Analysis stratified by sex- Female only

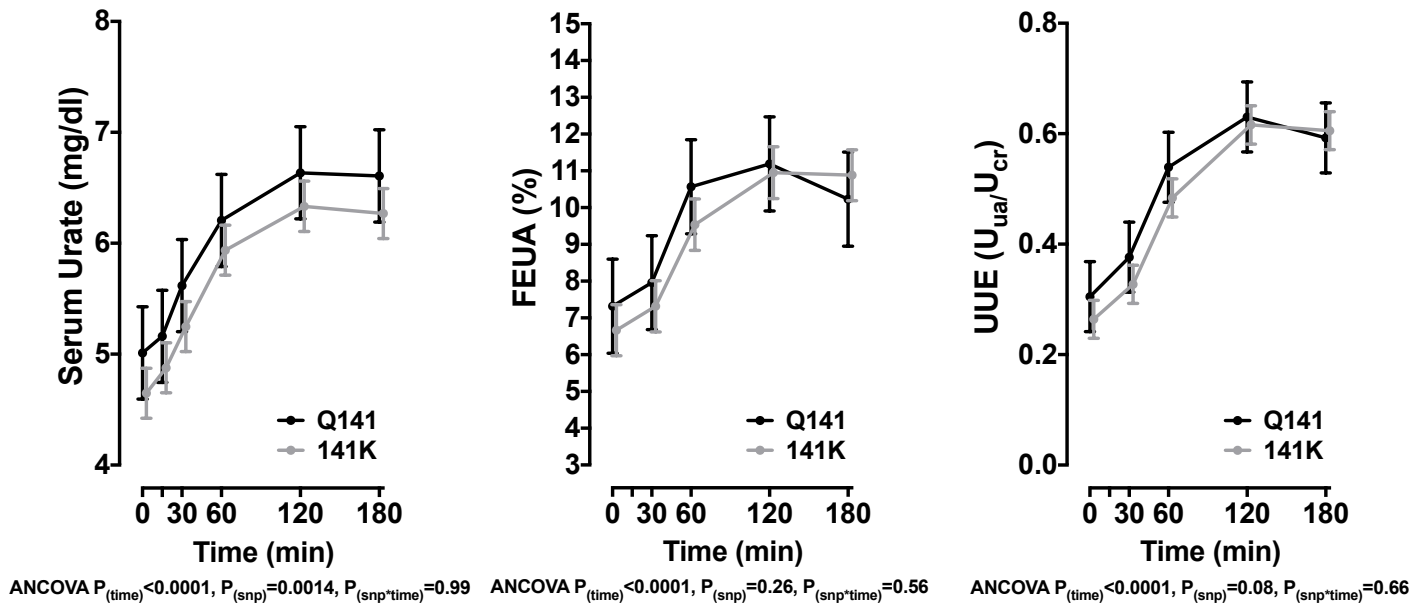

B: Analysis of non risk allele carriers (Q141) stratified by sex

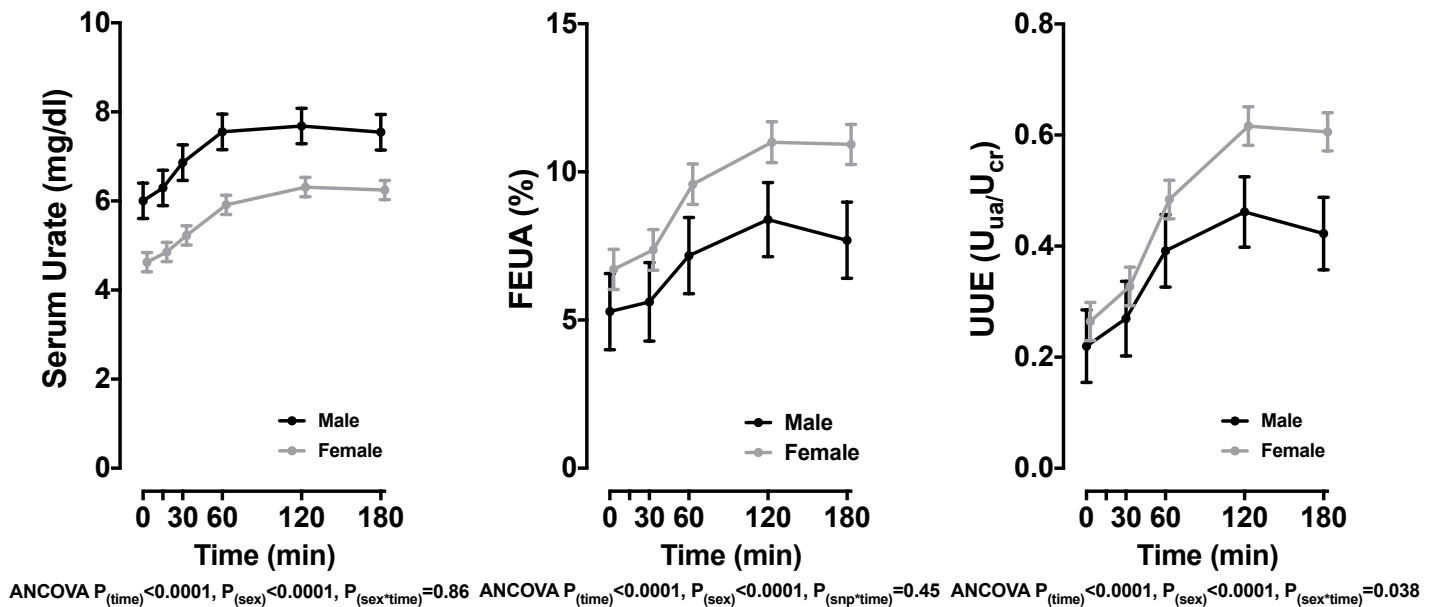

## Supplementary Figure 7: Partial sex stratified analysis

A) Effect of *ABCG2* genotypes (Supplementary Table 1 for characteristics of participants), stratified by sex, on dependence of serum urate (SU), FEUA, and urinary urate excretion (UUE) in female only participants following inosine load (79 participants; +/- SD of mean). Statistical significance evaluated by a two-tailed ANCOVA, adjusted for age, ancestry, and BMI. (B) Effect of sex (non- risk allele only), on serum urate (SU), FEUA, and urinary urate excretion (UUE) in participants following inosine load (79 participants; +/- SD of mean). Statistical significance evaluated by a two-tailed ANCOVA, adjusted for age, ancestry, and BMI. Source data are provided as a Source Data file.

**Supplementary Table 1. Characteristics of participants at baseline (n = 100).**  
 Unless stated, data are presented as mean (SD).

|                                                                   |                    |
|-------------------------------------------------------------------|--------------------|
| <i>Age, years</i>                                                 | 29 (13)            |
| <i>Male sex, n (%)</i>                                            | 21 (21%)           |
| <i><u>Ancestry</u></i>                                            |                    |
| <i>Polynesian</i>                                                 | 50 (50%)           |
| <i>European</i>                                                   | 50 (50%)           |
| <i>Body mass index, kg/m<sup>2</sup></i>                          | 26 (6.0)           |
| <i>Waist circumference, cm</i>                                    | 85 (13)            |
| <i>Systolic blood pressure, mmHg</i>                              | 117 (13)           |
| <i>Diastolic blood pressure, mmHg</i>                             | 67 (8)             |
| <i>Serum urate (mg/dL)</i>                                        | 4.99 (1.31)        |
| <i>Serum creatinine (mg/dL)</i>                                   | 0.79 (0.12)        |
| <i>Fractional excretion of urate, %</i>                           | 6.5 (2.4)          |
| <i>SLC2A9 rs11942223 protective C allele present, n (%)</i>       | 38 (38%)           |
| <i>ABCG2 rs2231142 risk T allele present, n (%)</i>               | 21 (21%; MAF 0.11) |
| <i>ABCG2 rs2231142 risk T allele frequency by <u>Ancestry</u></i> |                    |
| <i>Polynesian</i>                                                 | 13 (MAF: 0.13)     |
| <i>European</i>                                                   | 8 (MAF: 0.09)      |

Supplementary Table 2. Blood and urine chemistries of Female WT and Q140K+/+ mice

|                        | Blood Chemistry        |                               | Urine Chemistry      |                |
|------------------------|------------------------|-------------------------------|----------------------|----------------|
|                        | WT (n=6)               | Q141K+/+ (n=6)                | WT (n=6)             | Q141K+/+ (n=6) |
| <b>Na+</b> [mmol/l]    | 132.50 ± 5.0           | 140.33 ± 2.63                 | <b>Na+</b> [mmol/l]  | 39.68 ± 2.33   |
| <b>K+</b> [mmol/l]     | 4.48 ± 0.30            | 4.60 ± 0.33                   | <b>K+</b> [mmol/l]   | 115.83 ± 6.54  |
| <b>Cl-</b> [mmol/l]    | 114.0 ± 1.24           | 113.0 ± 1.24                  | <b>Cl-</b> [mmol/l]  | 114.4 ± 5.27   |
| <b>BUN</b> [mg/dl]     | 21.33 ± 1.80           | 21.67 ± 0.92                  | <b>UV</b> [ml/24hrs] | 3.62 ± 0.13    |
| <b>Hct</b> [%PCV]      | 31.0 ± 1.53            | 33.33 ± 1.15                  |                      | 2.69 ± 0.46    |
| <b>pH</b>              | 7.15 ± 0.03            | <b>7.22 ± 0.02 [p=0.04]</b>   |                      |                |
| <b>PCO2</b> [mmHg]     | 51.77 ± 5.43           | 50.10 ± 2.93                  |                      |                |
| <b>HCO3</b> [mmol/l]   | 17.62 ± 0.82           | <b>20.47 ± 0.68 [p=0.011]</b> |                      |                |
| <b>Beecf</b> [mmol/l]  | -11.17 ± 0.60          | <b>-7.17 ± 0.79 [p=0.001]</b> |                      |                |
| <b>AnGap</b> [mmol/l]  | 7.17 ± 3.52            | 12.00 ± 2.10                  |                      |                |
| <b>Hb</b> [g/dl]       | 10.57 ± 0.52           | 11.33 ± 0.38                  |                      |                |
|                        | <b>Serum Chemistry</b> |                               |                      |                |
| <b>IGF1</b> [pg/ml]    | 150.03 ± 29.59         | 147.92 ± 36.54                |                      |                |
| <b>Insulin</b> [ng/ml] | 1.378 ± 0.21           | 1.24 ± 0.29                   |                      |                |
| <b>Glucose</b> [mg/dl] | 175.67 ± 20.41         | 177.50 ± 14.41                |                      |                |

Blood, serum, and urine chemistries from WT and Q140K+/+ female animals. Blood chemistries acquired using the iSTAT device (see methods), abbreviations as follows: BUN, Blood urea nitrogen; Hct, hematocrit; Beecf, Base excess; AnGap, anion gap; Hb, hemoglobin; IGF1, insulin like growth factor 1; UV, urinary volume (rate); Bold values are significant; Statistical analysis: one-tailed Student's t-tests, significance, +/-SEM.

**Supplementary Table 3: Sex stratified analysis**

| <b>ABCG2 rs2231142 risk T allele</b>                         |                    |                 |                      |
|--------------------------------------------------------------|--------------------|-----------------|----------------------|
|                                                              | <b>absent</b>      | <b>present</b>  | <b>Total</b>         |
| <i>Female</i>                                                | 61                 | 18              | 79                   |
| <i>Male</i>                                                  | 18                 | 3               | 21                   |
| <i>Total</i>                                                 | 79                 | 21              | 100                  |
| <b>Model 1 Whole Cohort</b>                                  |                    |                 |                      |
|                                                              | <b>Serum Urate</b> | <b>FEUA (%)</b> | <b>UUE (Uua/Ucr)</b> |
| <i>time</i>                                                  | <0.0001            | <0.0001         | <0.0001              |
| <i>SNP</i>                                                   | 0.0005             | 0.82            | 0.12                 |
| <i>time*SNP</i>                                              | 0.99               | 0.69            | 0.86                 |
| <i>Ethnicity</i>                                             | 0.0014             | 0.0002          | <0.0001              |
| <i>Sex</i>                                                   | <0.0001            | <0.0001         | <0.0001              |
| <i>age</i>                                                   | <0.0001            | <0.0001         | 0.28                 |
| <i>BMI</i>                                                   | <0.0001            | <0.0001         | 0.033                |
| <b>Model 2 Whole Cohort with Sex by SNP interaction Term</b> |                    |                 |                      |
|                                                              | <b>Serum Urate</b> | <b>FEUA (%)</b> | <b>UUE (Uua/Ucr)</b> |
| <i>time</i>                                                  | <.0001             | <.0001          | <.0001               |
| <i>SNP</i>                                                   | 0.0226             | 0.2239          | 0.6574               |
| <i>time*SNP</i>                                              | 0.9984             | 0.9874          | 0.9964               |
| <i>sex</i>                                                   | <.0001             | <.0001          | <.0001               |
| <i>Time*sex</i>                                              | 0.9286             | 0.9279          | 0.5713               |
| <i>SNP*Sex</i>                                               | 0.7086             | 0.0447          | 0.3091               |
| <i>time*SNP*Sex</i>                                          | 0.9974             | 0.8934          | 0.8761               |
| <i>Ethnicity</i>                                             | 0.0016             | 0.0002          | <.0001               |
| <i>age</i>                                                   | <.0001             | <.0001          | 0.2812               |
| <i>BMI</i>                                                   | <.0001             | <.0001          | 0.0288               |
| <b>Model 3 Just Females</b>                                  |                    |                 |                      |
|                                                              | <b>Serum Urate</b> | <b>FEUA (%)</b> | <b>UUE (Uua/Ucr)</b> |
| <i>time</i>                                                  | <.0001             | <.0001          | <.0001               |
| <i>SNP</i>                                                   | 0.0014             | 0.2552          | 0.0773               |
| <i>time*SNP</i>                                              | 0.9995             | 0.558           | 0.6634               |
| <i>Ethnicity</i>                                             | <.0001             | <.0001          | 0.0001               |
| <i>age</i>                                                   | <.0001             | <.0001          | 0.069                |
| <i>BMI</i>                                                   | <.0001             | <.0001          | 0.124                |
